# Supplementary material for: Monoclonal antibody humanness score and its applications
Source: PubMed Central journal article supplement (PMC3729710; doi:10.1186/1472-6750-13-55), 2013-07-05
Supplement: 1472-6750-13-55-S3.pdf [file 1472-6750-13-55-S3.pdf]

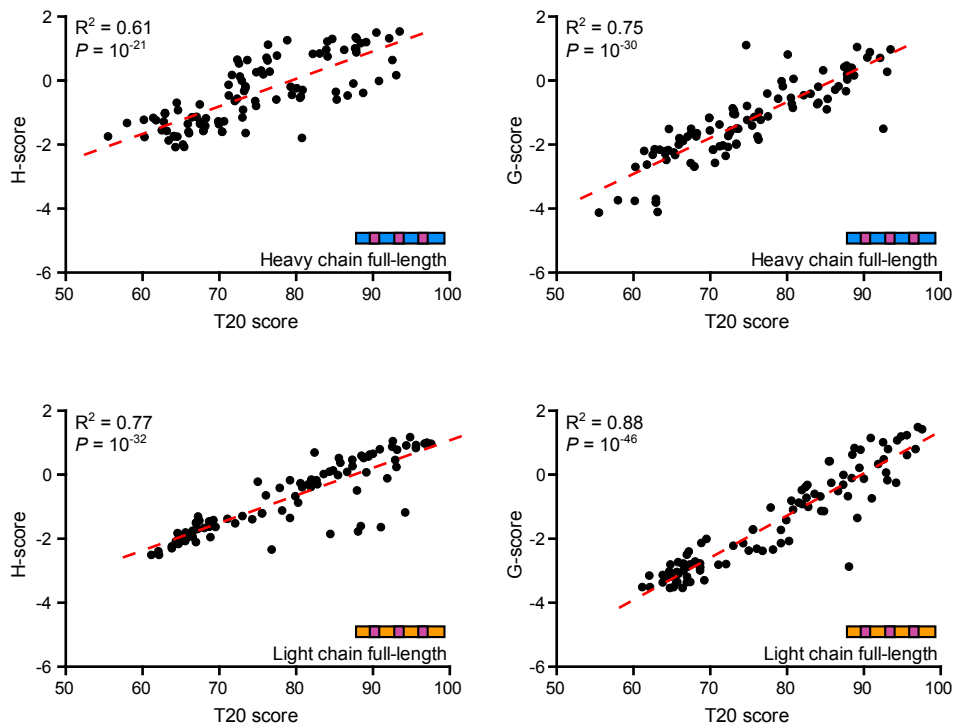

**Figure S3 Comparison of T20 score with H-score and G-score.** T20 scores, H-scores, and G-scores were obtained for 98 heavy chain full-length (top) and kappa light chain full-length (bottom) therapeutic antibody sequences. Note that the H-score and G-score are scaled based on Z-scores. T20 scores were directly compared to H-scores (left) or G-score (right), and Pearson correlations were calculated (red-dashed line;  $R^2$ ).  $P$ -values are one-sided  $t$ -tests.
