# Supplementary material for: Monoclonal antibody humanness score and its applications
Source: PubMed Central journal article supplement (PMC3729710; doi:10.1186/1472-6750-13-55), 2013-07-05
Supplement: 1472-6750-13-55-S5.pdf [file 1472-6750-13-55-S5.pdf]

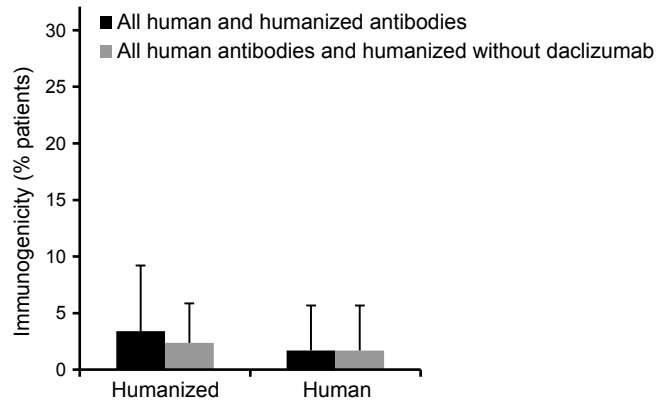

**Figure S5 No difference in immunogenicity of humanized and human antibodies after removing daclizumab.** The black bars are the average  $\pm$  SD immunogenicity of all human and humanized antibodies; the gray bars show the average  $\pm$  SD immunogenicity of all human antibodies and humanized antibodies without daclizumab.
