# Supplementary material for: Monoclonal antibody humanness score and its applications
Source: PubMed Central journal article supplement (PMC3729710; doi:10.1186/1472-6750-13-55), 2013-07-05
Supplement: 1472-6750-13-55-S7.pdf [file 1472-6750-13-55-S7.pdf]

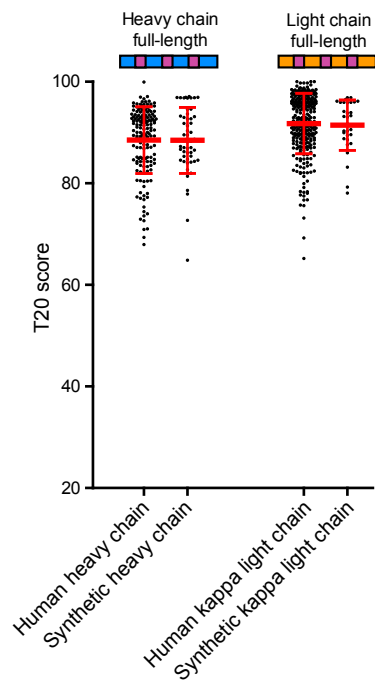

**Figure S7 No difference in T20 score of human antibodies and synthetic antibodies.** T20 scores were obtained for each listed group of antibodies for the indicated chain type for full-length antibody sequences. Individual antibody sequences are shown as small circles, and the average  $\pm$  SD T20 score is shown for each group.
